# Supplementary material
Source: PubMed Central journal article supplement (PMC4100987)
Supplement: cbt-15-862-s01.pdf [file cbt-15-862-s01.pdf]

## **Supplemental Material to:**

**Karina Kristoffersen, Mette Kjølhede Nedergaard,  
Mette Villingshøj, Rehannah Borup, Helle Broholm,  
Andreas Kjær, Hans Skovgaard Poulsen,  
and Marie-Thérèse Stockhausen**

**Inhibition of Notch signaling alters the phenotype of  
orthotopic tumors formed from glioblastoma multiforme  
neurosphere cells but does not hamper intracranial tumor  
growth regardless of endogene Notch pathway signature**

**Cancer Biology & Therapy 2014; 15(7)**

**<http://dx.doi.org/10.4161/cbt.28876>**

**<http://www.landesbioscience.com/journals/cbt/article/28876/>**

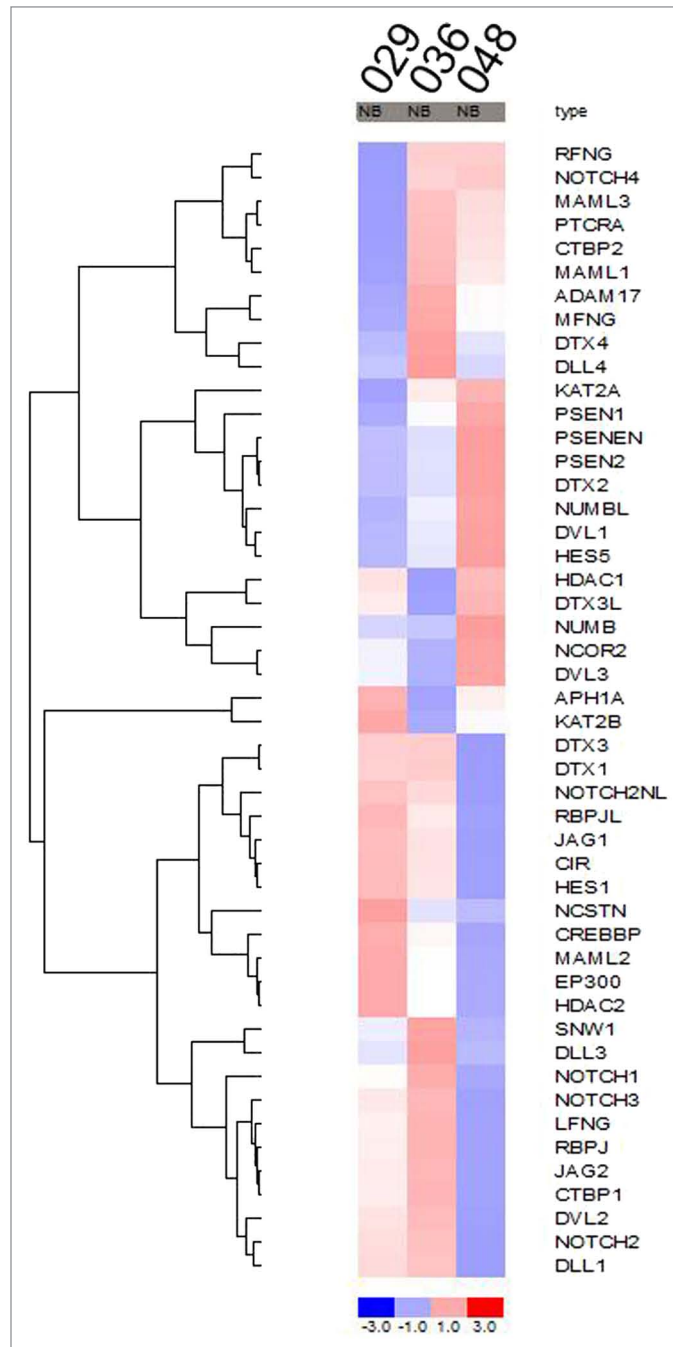

**Figure S1.** Gene expression analysis revealed different Notch signatures between the GBM neurosphere cultures investigated. Heat map showing the expression of all Notch components from the “KEGG Notch signaling pathway” gene set downloaded from the “Molecular Signature Database v3.1” at <http://www.broadinstitute.org/gsea/msigdb/index.jsp>. The colors represent the standard deviation in expression level relative to the mean expression of the respective gene in the three samples respectively.

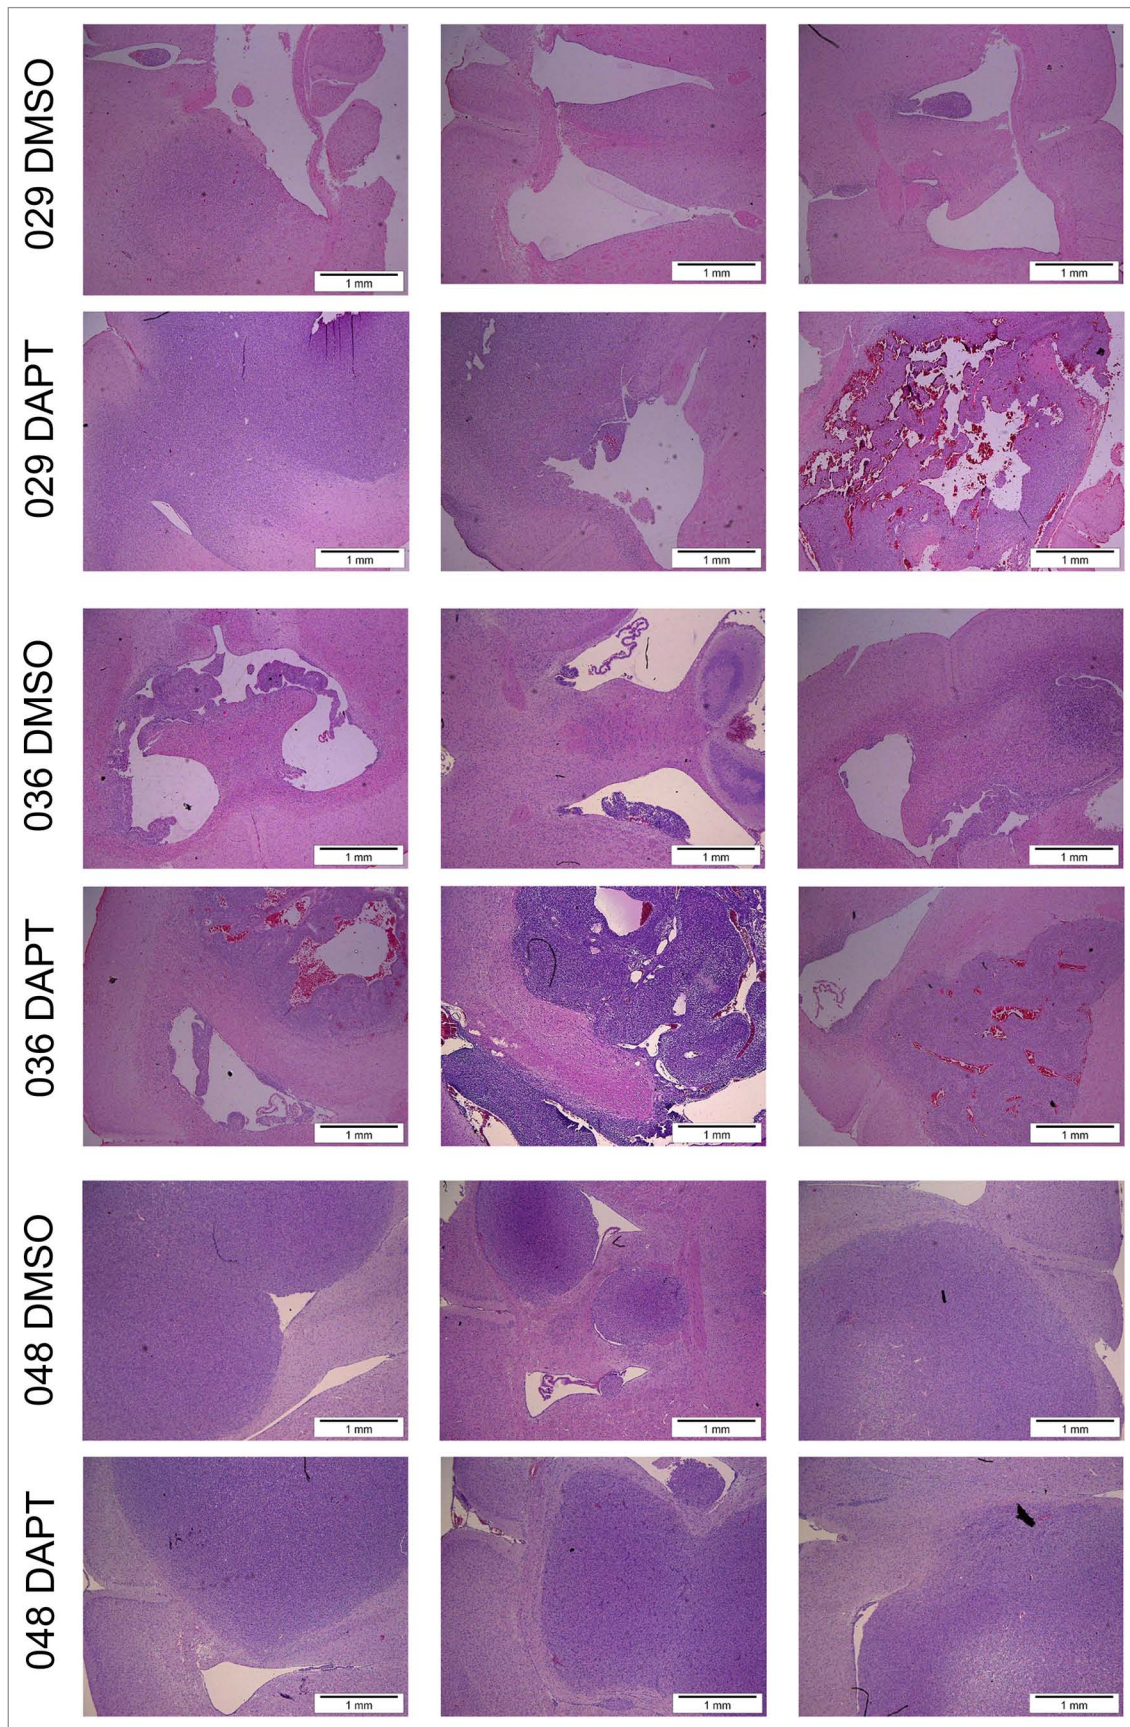

**Figure S2.** H&E pictures of the tumors evaluated by IHC. H&E of formalin-fixed, paraffin-embedded brains with tumors from each treatment group of the three tumor-types. Scale bar shows 1 mm.



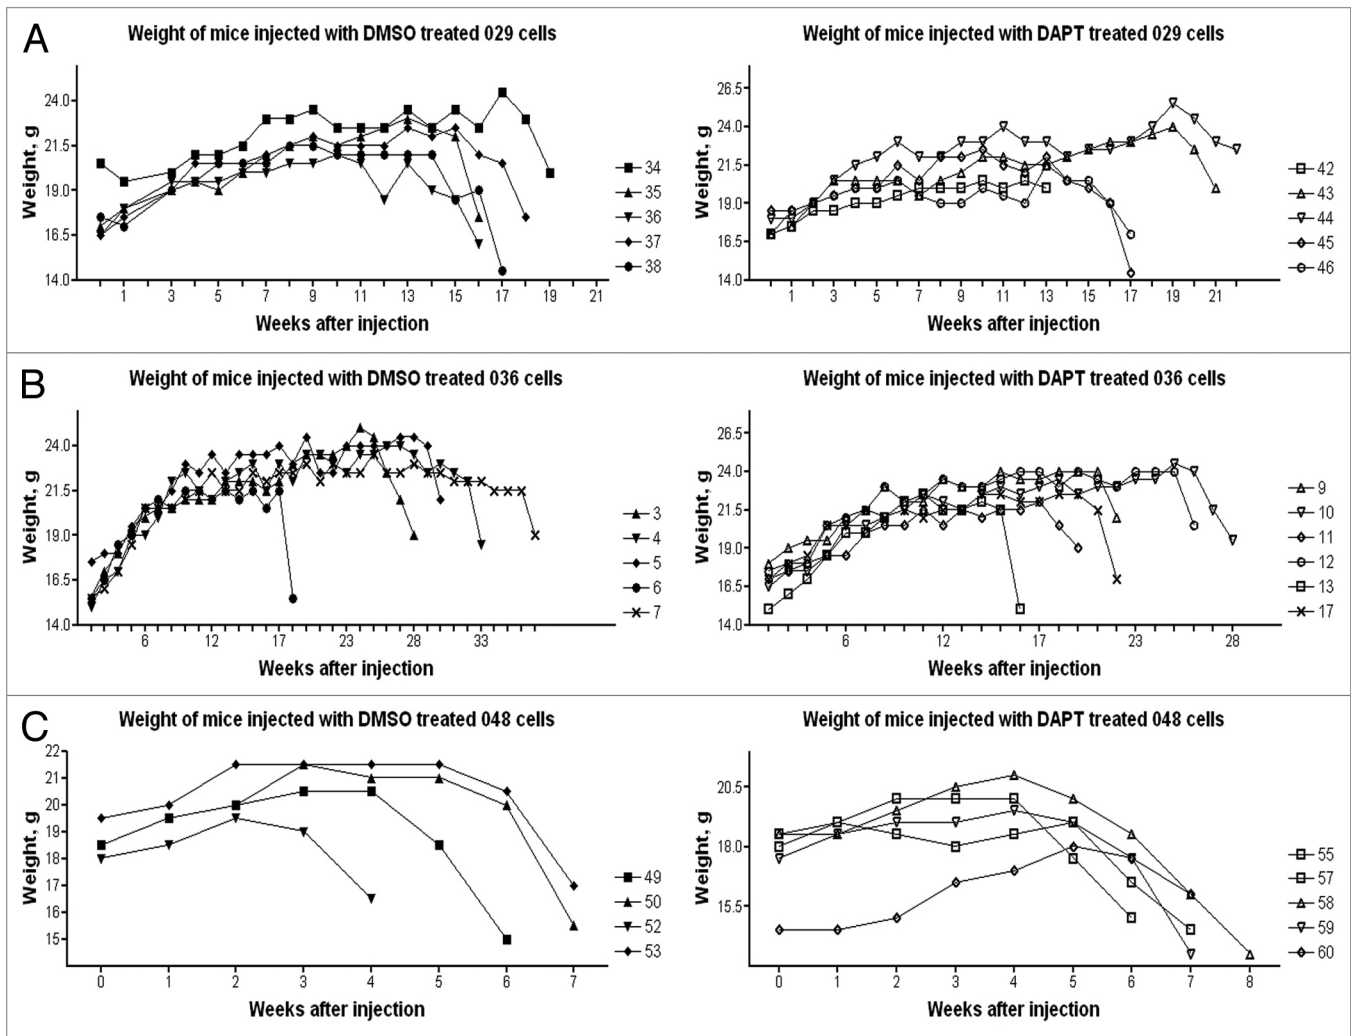

**Figure S3.** Weight curves of the individual mouse throughout the experiment period. Each individual mouse was monitored and weighted frequently during the experiment and was euthanized when it showed tumor related symptoms or considerable weight loss.
